# Supplementary material for: Design and Characterization of Spray-Dried Chitosan-Naltrexone Microspheres for Microneedle-Assisted Transdermal Delivery
Source: MDPI journal article supplement (doi:10.3390/pharmaceutics12060496), 2020-05-29
Supplement: s1 [file s1]

# Supplementary Materials: Design and Characterization of Spray-Dried Chitosan-Naltrexone Microspheres for Microneedle-Assisted Transdermal Delivery

Abayomi T. Ogunjimi, Jennifer Fiegel and Nicole K. Brogden \*

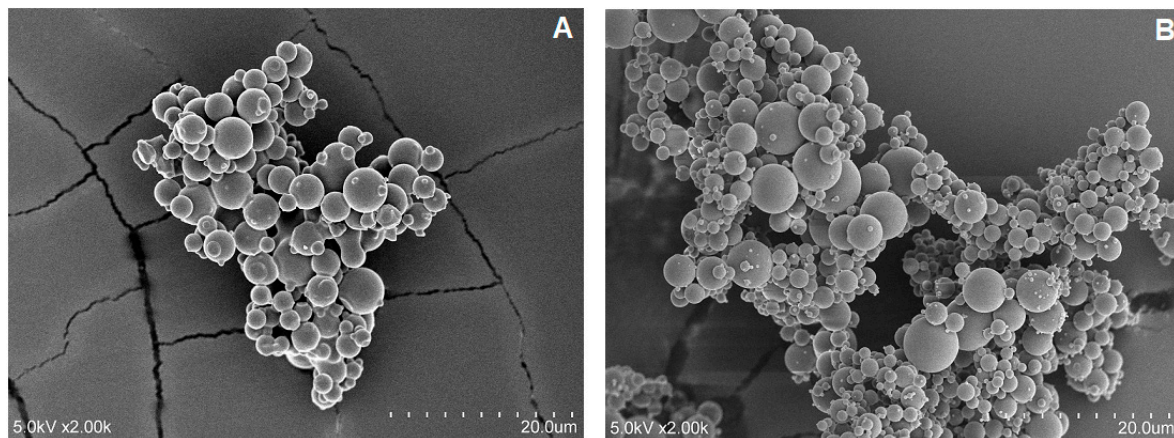

**Figure S1.** SEM photomicrographs of formulation (A) F19 and (B) F27.
